# Supplementary material
Source: HighWire-hosted journal article supplement (https://bmjopen.bmj.com/content/9/12/e033462)

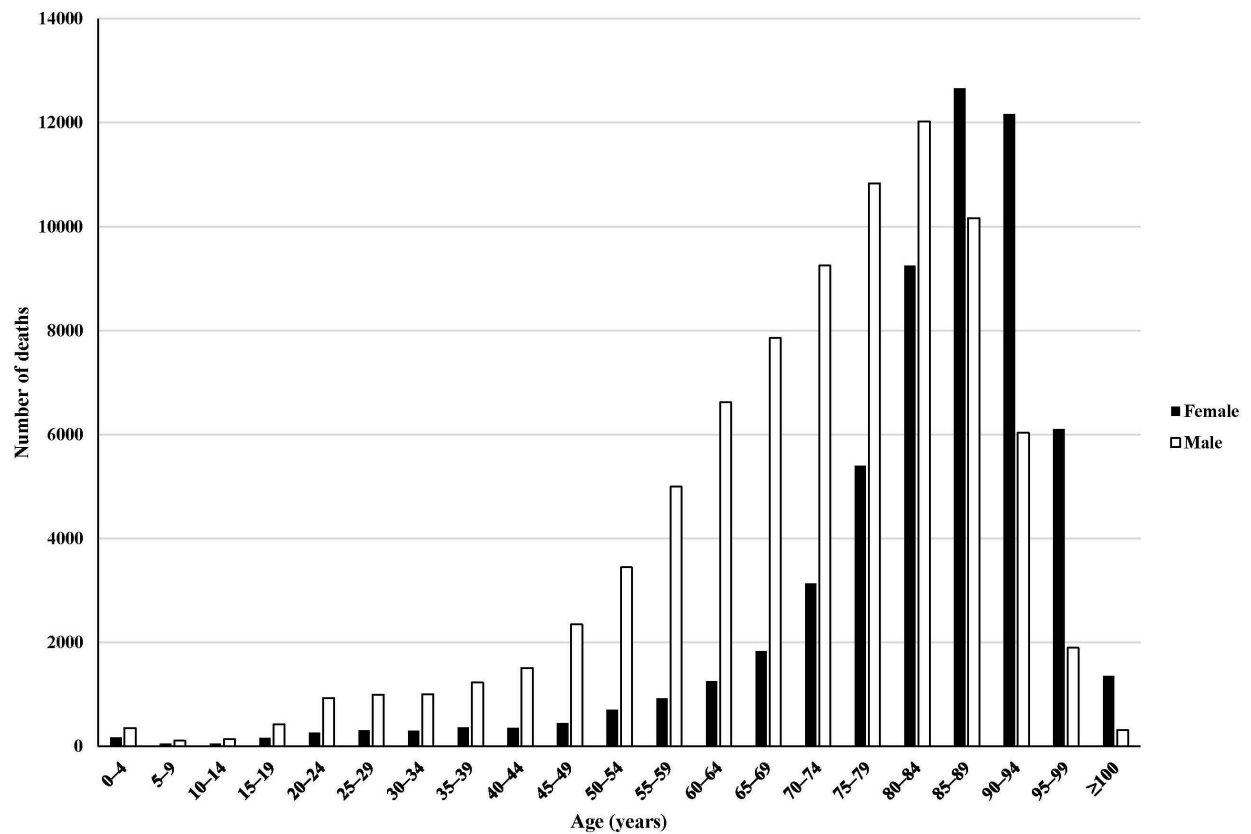

Supplementary Figure S1. Total number of deaths by age and sex in 1997-2016

Supplement: inline-supplementary-material-2 [file inline-supplementary-material-2.pdf]

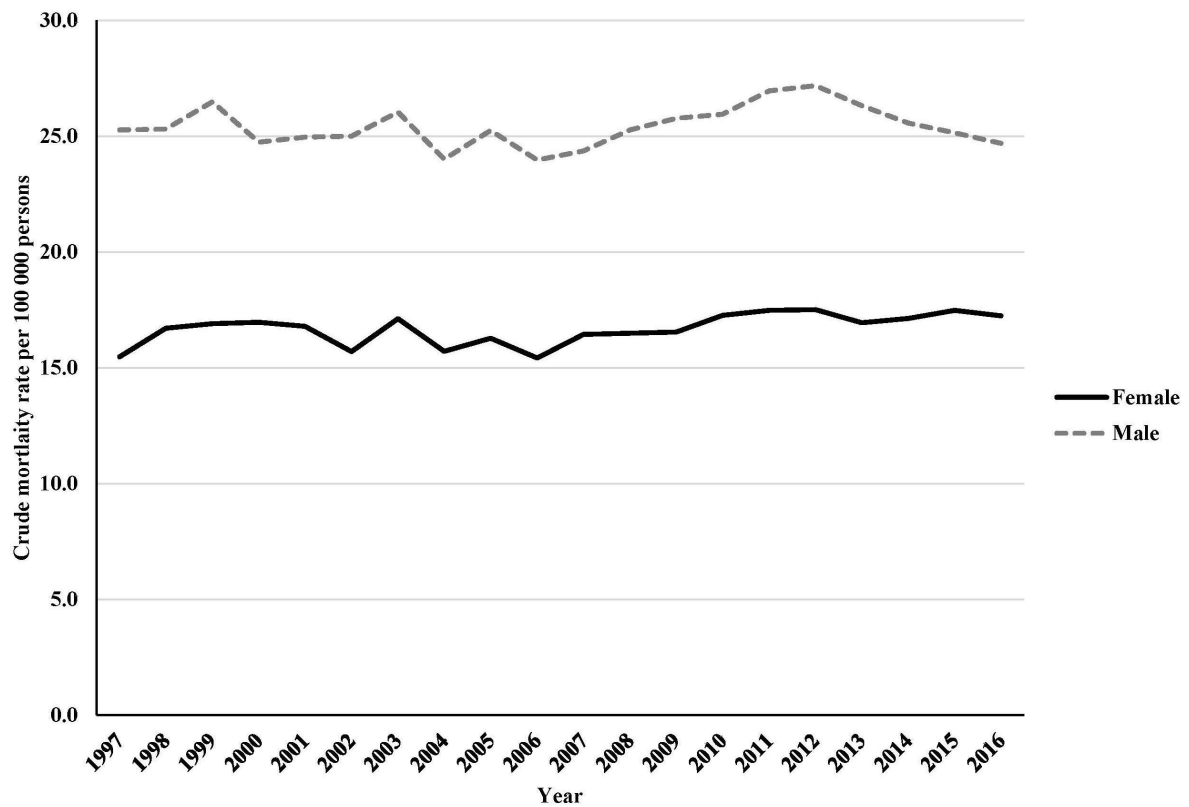

Supplementary Figure S3. Crude death rate per 100 000 persons aged  $\geq 65$  years by sex from 1997 to 2016.

Supplement: inline-supplementary-material-4 [file inline-supplementary-material-4.pdf]
